# Supplementary material
Source: publisher site journal article supplement (https://www.dovepress.com/get_supplementary_file.php?f=Fig-s1-s3-225038.docx)
Supplement: Supplementary file 1 [file get_supplementary_file.php]

**Supporting Information**

**Synthesis; characterization and DNA binding investigations of a new binuclear Ag(I) complex** **and evaluation of its anticancer property**

Mian-Hong Zheng a,1, Fahime Bigdeli b,1, Lan-Xing Gao a,1, Deng-Ze Wu a,*, Xiao-Wei Yan c, Mao-Lin Hu c, Ali Morsali b,*

a College of Chemistry and Materials Engineering, Wenzhou University, Wenzhou 325035, People's Republic of China
bDepartment of Chemistry, Faculty of Sciences, Tarbiat Modares University, P.O. Box 14115-175, Tehran, Iran

c College of Materials and Chemical Engineering, and Guangxi Key Laboratory of Calcium Carbonate Resources Comprehensive Utilization, Hezhou University, Hezhou, Guangxi 542800, People's Republic of China

**1** These authors contribute equally to the work.

*Corresponding authors:

E-mail addresses:  [wudengze@wzu.edu.cn](mailto:wudengze@wzu.edu.cn)[(D.-Z. Wu)](mailto:5219849@qq.com,),  [morsali_a@modares.ac.ir](mailto:morsali_a@modares.ac.ir) (A. Morsali).

**
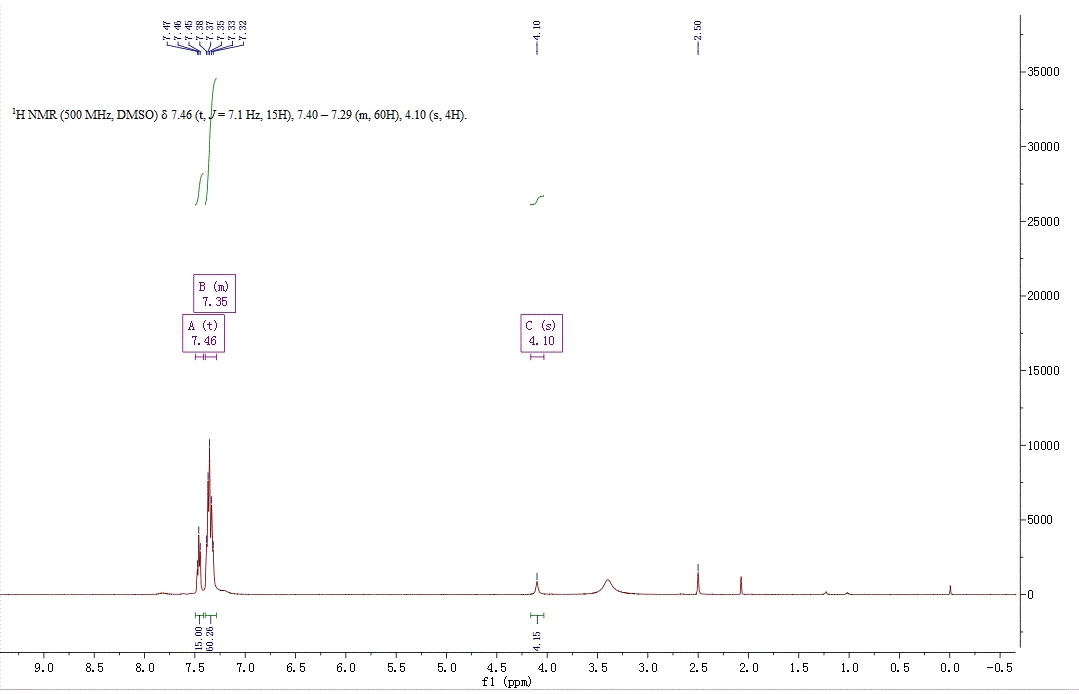
**

Figure 1S. 1H NMR of complex A3


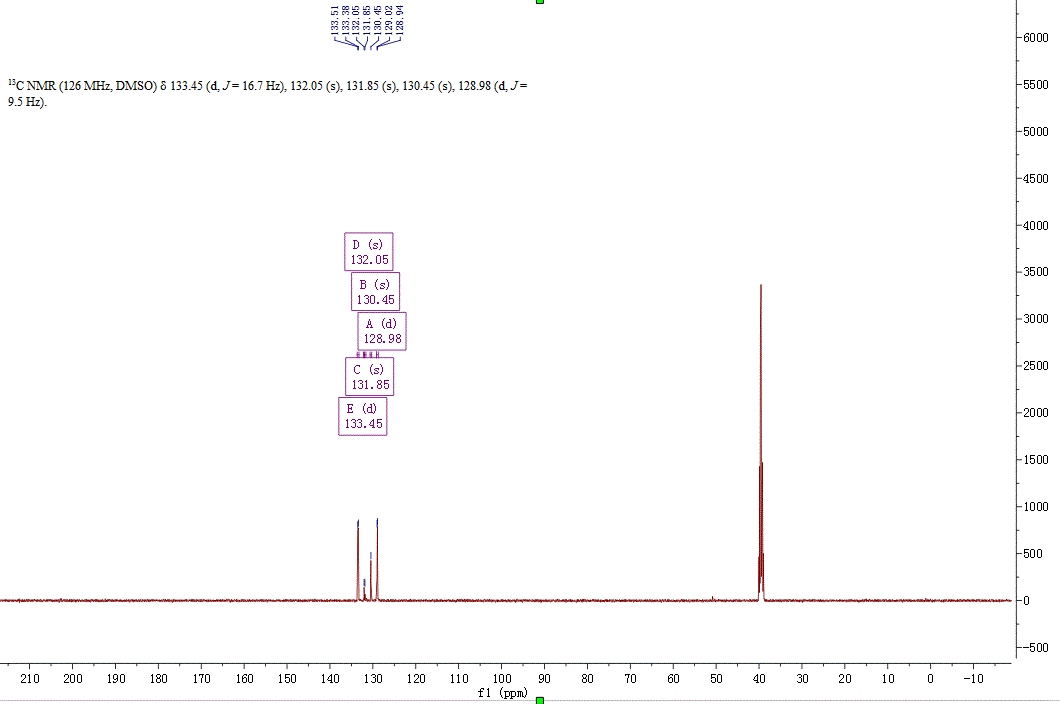


Figure 2S. 13C NMR of complex A3


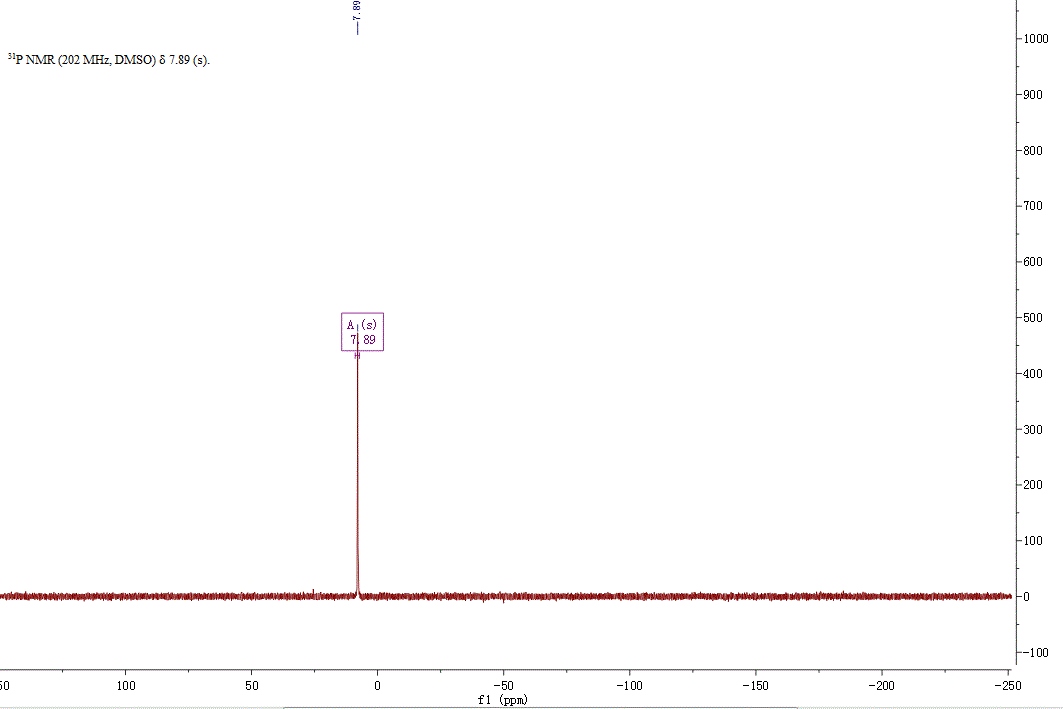


Figure 3S. 31P NMR of complex A3

**How to obtain Eq (A.1):**

The amount of binding constant is as follows:

(1S)

And the following equations can be concluded

(2S)

(3S)

(4S)

(5S)

(6S)

Put Eqs. (3S) and (6S) into (1S) yields:

(7S)

(8S)

To Eq. (8S), it is assumed that m = 1, using ΔIp indicates ΔI，ΔIp,max indicates ΔIMAX. As shown in Fig. 8 (inserted pictures)displayed a good linear relationship with so the assumptive value of m was appropriate. Thus, the Eq. (A.1) is achieved.

Eq. (A.1)
